# Supplementary material for: Comparison of older patient’s self-care abilities in acute geriatric and internal medicine departments
Source: Springer Nature journal article supplement (doi:10.1007/s00391-019-01570-y), 2019-06-13
Supplement: MOESM5 [file 16809182]

**Supplementary Figure S1: ADL Ordinal, Independency at t2 and t4**

Abbreviations: t2 = admission; t4 = 30 days after admission; ADL = Activities of Daily Living

Displayed are only percentages of patients rating 4 = independent.

Significant results with Chi-Square Test linear-by-linear: at t2 AGU patients are more dependent in defecation (*P*=.003) and mobility (*P*=.033); at t4 AGU patients are more independent in urination (*P*=.021) and defecation (*P*=.022).
